# Supplementary material
Source: PubMed Central journal article supplement (PMC5610087)
Supplement: NIHMS891364-supplement.pdf [file NIHMS891364-supplement.pdf]

**Appendix**  
**Maternal Prepregnancy Weight and Children's Behavioral and Emotional Outcomes**  
**Deardorff et al.**

**Appendix Table 1.** Unadjusted Mean Differences in BPI Score Associated With Prepregnancy BMI in NLSYCYA Children

| Behavior                      | Boys               |                  | Girls               |                 | Full sample         |                 |
|-------------------------------|--------------------|------------------|---------------------|-----------------|---------------------|-----------------|
|                               | Estimate (95% CI)  | <i>p</i> -value  | Estimate (95% CI)   | <i>p</i> -value | Estimate (95% CI)   | <i>p</i> -value |
| <b>Total behavior</b>         |                    |                  |                     |                 |                     |                 |
| Underweight                   | 4.45 (2.03, 6.87)  | <b>&lt;0.001</b> | -0.16 (-2.54, 2.21) | 0.893           |                     |                 |
| Normal weight                 | Ref                |                  | Ref                 |                 |                     |                 |
| Overweight                    | 1.06 (-0.86, 2.97) | 0.280            | 0.82 (-1.05, 2.68)  | 0.391           |                     |                 |
| Obese Class I                 | 2.11 (-1.14, 5.37) | 0.205            | -0.43 (-3.21, 2.36) | 0.764           |                     |                 |
| Obese Class II/III            | 7.31 (2.30, 12.33) | <b>&lt;0.01</b>  | 1.61 (-3.58, 6.81)  | 0.543           |                     |                 |
| <b>Externalizing behavior</b> |                    |                  |                     |                 |                     |                 |
| Underweight                   | 5.31 (2.66, 7.96)  | <b>&lt;0.001</b> | 0.46 (-2.25, 3.16)  | 0.740           |                     |                 |
| Normal weight                 | Ref                |                  | Ref                 |                 |                     |                 |
| Overweight                    | 1.50 (-0.45, 3.44) | 0.133            | 0.84 (-0.96, 2.63)  | 0.362           |                     |                 |
| Obese Class I                 | 2.29 (-1.09, 5.66) | 0.186            | 0.65 (-2.27, 3.57)  | 0.663           |                     |                 |
| Obese Class II/III            | 4.86 (0.05, 9.67)  | <b>&lt;0.05</b>  | -0.08 (-4.46, 4.31) | 0.973           |                     |                 |
| <b>Internalizing behavior</b> |                    |                  |                     |                 |                     |                 |
| Underweight                   |                    |                  |                     |                 | 0.66 (-1.05, 2.38)  | 0.448           |
| Normal weight                 |                    |                  |                     |                 | Ref                 |                 |
| Overweight                    |                    |                  |                     |                 | -0.11 (-1.60, 1.37) | 0.880           |
| Obese Class I                 |                    |                  |                     |                 | -0.14 (-2.32, 2.04) | 0.902           |
| Obese Class II/III            |                    |                  |                     |                 | 1.90 (-1.53, 5.33)  | 0.278           |

*Note:* Boldface indicates statistical significance ( $p < 0.05$ ). *p*-values for Prepregnancy weight by gender interactions: 0.019 (total behavior);  $< 0.001$  (externalizing behavior); 0.135 (internalizing behavior)

BPI, Behavior Problems Index; NLSYCYA, National Longitudinal Survey of Youth Children/Young Adults

**Appendix**  
**Maternal Prepregnancy Weight and Children's Behavioral and Emotional Outcomes**  
**Deardorff et al.**

**Appendix Table 2.** Adjusted Mean Differences in BPI Score Associated With Prepregnancy BMI From Fixed Effects Regression in the NLSYCYA Sibling Subset

| Behavior                      | Boys                 |                 | Girls                |                 | Full sample         |                 |
|-------------------------------|----------------------|-----------------|----------------------|-----------------|---------------------|-----------------|
|                               | Estimate (95% CI)    | <i>p</i> -value | Estimate (95% CI)    | <i>p</i> -value | Estimate (95% CI)   | <i>p</i> -value |
| <b>Total behavior</b>         |                      |                 |                      |                 |                     |                 |
| Underweight                   | 1.84 (-3.28, 6.96)   | 0.480           | -5.14 (-10.70, 0.42) | 0.070           |                     |                 |
| Normal weight                 | Ref                  |                 |                      |                 |                     |                 |
| Overweight                    | 1.76 (-2.10, 5.61)   | 0.370           | 5.31 (1.31, 9.32)    | <b>&lt;0.05</b> |                     |                 |
| Obese Class I                 | 0.87 (-5.85, 7.58)   | 0.799           | -5.28 (-11.76, 1.20) | 0.110           |                     |                 |
| Obese Class II/III            | 10.56 (-1.81, 22.93) | 0.094           | -5.93 (-12.54, 0.69) | 0.079           |                     |                 |
| <b>Externalizing behavior</b> |                      |                 |                      |                 |                     |                 |
| Underweight                   | 3.83 (-2.13, 9.80)   | 0.207           | -4.58 (-11.3, 2.14)  | 0.181           |                     |                 |
| Normal weight                 | Ref                  |                 |                      |                 |                     |                 |
| Overweight                    | 2.45 (-2.06, 6.96)   | 0.286           | 3.71 (-1.40, 8.82)   | 0.153           |                     |                 |
| Obese Class I                 | 1.77 (-5.06, 8.60)   | 0.610           | -3.92 (-11.57, 3.73) | 0.314           |                     |                 |
| Obese Class II/III            | 10.74 (-1.77, 23.25) | 0.092           | -3.39 (-11.56, 4.79) | 0.415           |                     |                 |
| <b>Internalizing behavior</b> |                      |                 |                      |                 |                     |                 |
| Underweight                   |                      |                 |                      |                 | -2.08 (-5.40, 1.24) | 0.218           |
| Normal weight                 | Ref                  |                 |                      |                 |                     |                 |
| Overweight                    |                      |                 |                      |                 | 0.75 (-1.45, 2.95)  | 0.504           |
| Obese Class I                 |                      |                 |                      |                 | -1.57 (-5.15, 2.00) | 0.386           |
| Obese Class II/III            |                      |                 |                      |                 | -3.30 (-8.56, 1.96) | 0.217           |

*Note:* Boldface indicates statistical significance ( $p < 0.05$ ).

BPI, Behavior Problems Index; NLSYCYA, National Longitudinal Survey of Youth Children/Young Adults
